# Supplementary material for: Nutrient resupplementation arrests bio-oil accumulation in Phaeodactylum tricornutum
Source: PubMed Central journal article supplement — Appl Microbiol Biotechnol. 2013 Jun 15;97(15):7049–59. doi: 10.1007/s00253-013-5010-y (PMC3708285; doi:10.1007/s00253-013-5010-y), 2013-06-15

**Title:** Nutrient Re-Supplementation Arrests Bio-Oil Accumulation in *Phaeodactylum tricornutum*

**Contributors:** Valenzuela, J.<sup>1,2</sup>, R.P. Carlson<sup>2,3,6</sup>, R. Gerlach<sup>2,3,6</sup>, K.E. Cooksey<sup>4</sup>, B.M. Peyton<sup>2,3,6</sup>, B. Bothner<sup>1,6</sup>, and M.W. Fields<sup>2,4,5,6\*</sup>

**Affiliations:** <sup>1</sup>Department of Chemistry and Biochemistry, Montana State University, Bozeman, MT

<sup>2</sup>Center for Biofilm Engineering, Montana State University, Bozeman, MT

<sup>3</sup>Department of Chemical and Biological Engineering, Montana State University, Bozeman, MT

<sup>4</sup>Department of Microbiology, Montana State University, Bozeman, MT

<sup>5</sup>Adjunct Research Fellow, National Center for Genome Resources, Santa Fe, NM

<sup>6</sup>Thermal Biology Institute, Montana State University, Bozeman, MT

**Journal:** *Applied Microbiology and Biotechnology*

**Corresponding Author:**

Dr. M.W. Fields  
[matthew.fields@biofilm.montana.edu](mailto:matthew.fields@biofilm.montana.edu)

**Figure S1.** Nile Red specific fluorescence (Nile Red fluorescence intensity/cell) in *P. tricornutum*. Graphs start at 90 hours to show time-points of initial nitrate depletion (92.5 hours or 98 hours). A) Specific Nile Red fluorescence in control conditions and nutrient replete conditions: Control (×), N replete (●), P replete (▲), N+P replete (■). B) Specific Nile Red fluorescence in control conditions and nutrient re-supplemented conditions: Control (×), N re-supplemented (●), P supplemented (▲), N+P supplemented (■).

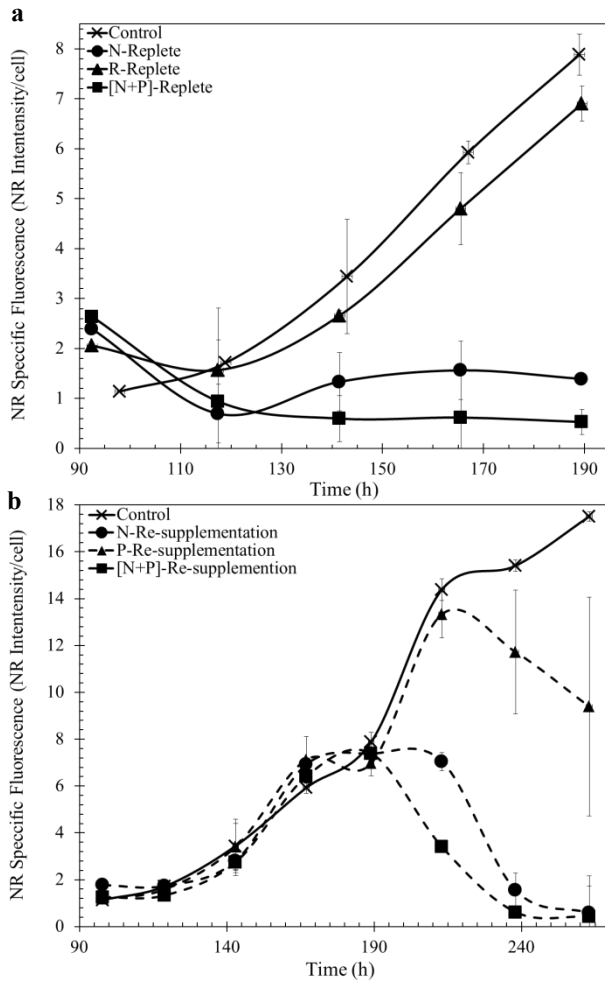

Supplement: 253_2013_5010_MOESM1_ESM.pdf [file 253_2013_5010_MOESM1_ESM.pdf]
